# Supplementary material for: Fabrication of MnO/C composites utilizing pitch as the soft carbon source for rechargeable Li-ion batteries
Source: Royal Society of Chemistry journal article supplement (doi:10.1039/c6nj02309f), 2016-01-01
Supplement: c6nj02309f1.pdf [file c6nj02309f1.pdf]

## Fabricating MnO/C composite utilizing pitch as soft carbon source for rechargeable

### Li-ion batteries

Xin-Yi Zhao, Xue Bai, Wei Yang, Dong Shen, Huan Yang, Ning Lun, Yong-Xin Qi\* and

Yu-Jun Bai\*

Key Laboratory for Liquid–Solid Structural Evolution and Processing of Materials (Ministry of Education), Shandong University, Jinan 250061, PR China

\* E-mail address: [byj97@126.com](mailto:byj97@126.com) (Y.-J. Bai); [qyx66@sdu.edu.cn](mailto:qyx66@sdu.edu.cn) (Y. X. Qi).

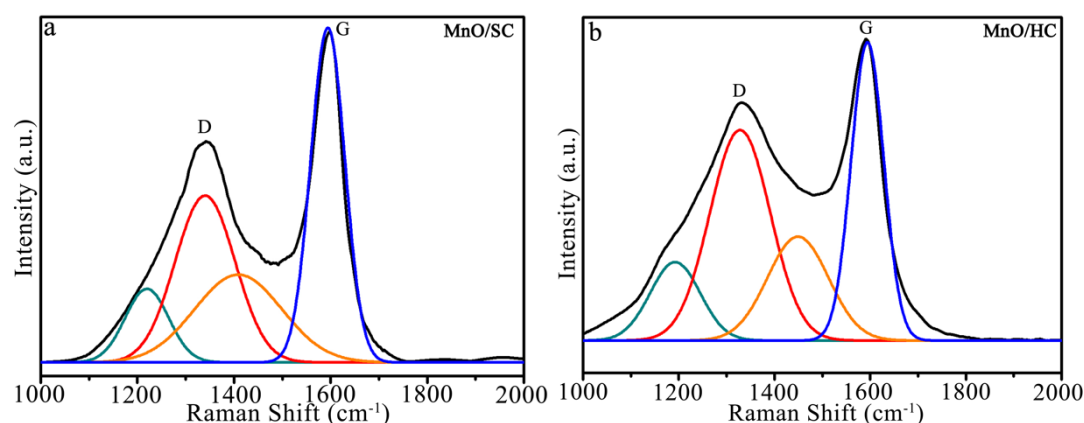

Fig. S1 Raman spectra of MnO/SC (a), and MnO/HC (b).

Table. S1 Capacity retention at varied current densities ( $\text{mA g}^{-1}$ ) for MnO/SC and MnO/HC

| Sample | Capacity retention at varied current densities |     |     |     |      |      |
|--------|------------------------------------------------|-----|-----|-----|------|------|
|        | 100                                            | 200 | 400 | 800 | 1600 | 100  |
| MnO/SC | 100%                                           | 83% | 67% | 50% | 33%  | 108% |
| MnO/HC | 100%                                           | 81% | 42% | 9%  | 1%   | 98%  |

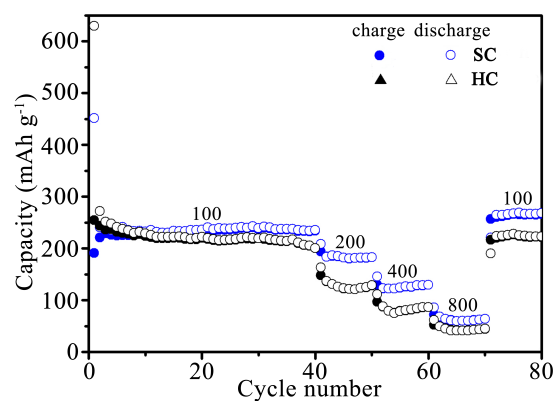

Fig. S2 Cycling performance at  $100 \text{ mA g}^{-1}$  and rate performance for the SC derived from pitch and HC derived from glucose.

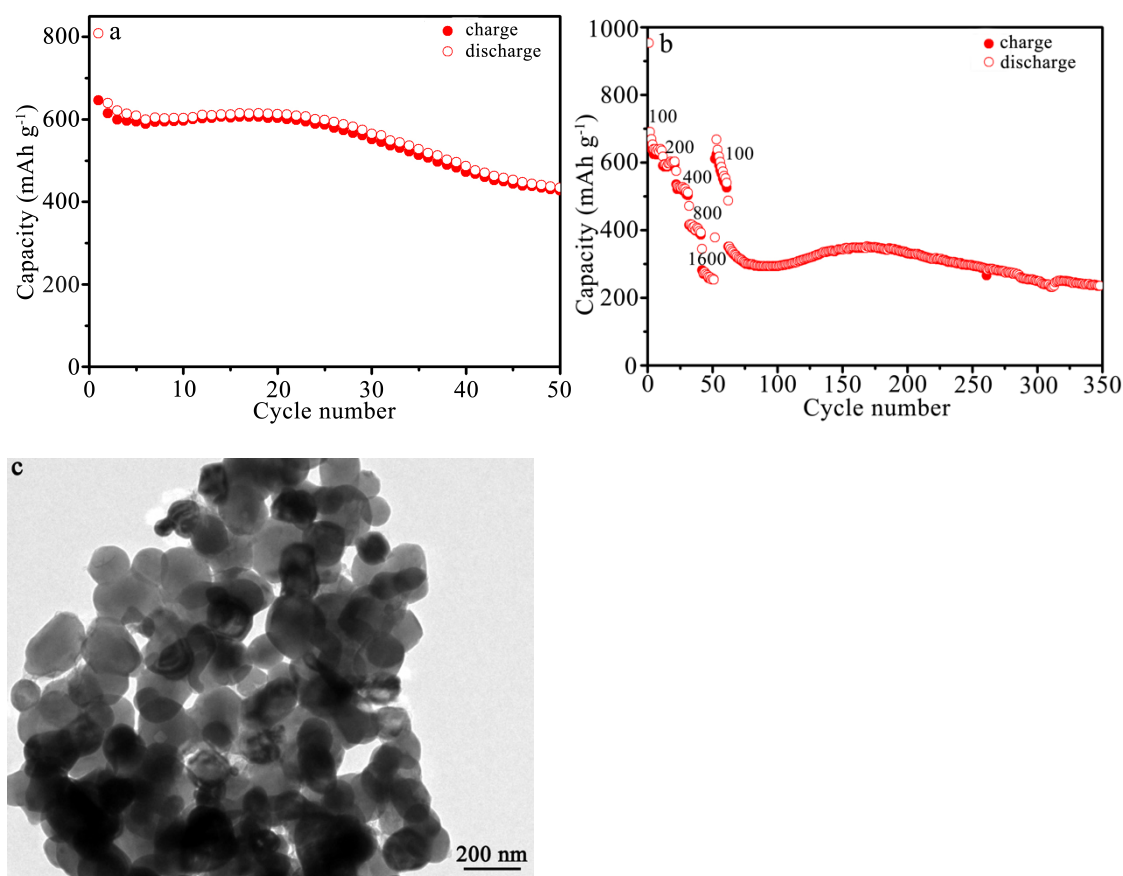

Fig. S3 Cycling performance at  $100 \text{ mA g}^{-1}$  (a), rate performance and long-term cycling performance at  $500 \text{ mA g}^{-1}$  after the rate performance test (b), and TEM image (c) for the

MnO/SC composite fabricated at 750 °C with the same amount of pitch and manganese oxides as the MnO/SC prepared at 600 °C.

### **1. Estimation of the theoretical capacity of MnO/C composites**

Theoretical capacity (MnO/C) = Theoretical capacity of carbon  $\times$  mass fraction of carbon +

Theoretical capacity of MnO  $\times$  mass fraction of MnO

According to the TG curves, the weight percent is 88.8 wt% for MnO and 11.2 wt% for carbon in MnO/SC, and is 95.1% for MnO and 4.9% for carbon in MnO/HC.

The theoretical capacity of MnO/SC =  $372 \times 11.2\% + 756 \times 88.8\% = 710 \text{ mAh g}^{-1}$

The theoretical capacity of MnO/HC =  $372 \times 4.9\% + 756 \times 95.1\% = 737 \text{ mAh g}^{-1}$
